# Supplementary material for: New insights into early medieval Islamic cuisine: Organic residue analysis of pottery from rural and urban Sicily
Source: PLoS One. 2021 Jun 9;16(6):e0252225. doi: 10.1371/journal.pone.0252225 (PMC8189454; doi:10.1371/journal.pone.0252225)
Supplement: S1 Data — (XLSX) [file pone.0252225.s005.xlsx]

## Sheet: Castello San Pietro (CSP)
Site		Sample information									Fatty acids					Ketones and APAAs			Alkanes and alcohols		Diterpenes	Isoprenoids	SRR%	Sterols	Wax esters	TAGs			GC-C-IRMS			Fruit carboxylic acids	Malic acid yield (µg/g)	Tartaric acid yield (µg/g)	%TA	Summary substance identification
Site name	Site code	Sample code	Chronology	Form	Technology	Provinance	Inventory number/ original form code	Reference for ceramic study	Form Id	Yield (µg/g)	sat. even-numb.	sat. odd-numb.	unsaturated	P/S (ug)	O/S (ug)	High temp. KT	Plant KT	APPAs	Alkanes	Alcohols (TMS)						Carbon number	Average carbon number (M)	Dispersion factor (DF)	δ 13C16:0 (‰)	δ 13C18:0 (‰)	Δ13C (C18:0-C16:0)
Castello San Pietro (PA)	CSP	CSP_C1	Late 9th- early 10th century	Olla	Wheel thrown	Palermo	B/2	Arcifa L, Bagnera A. Islamizzazione e cultura materiale a Palermo : una riconsiderazione dei contesti ceramici di Castello - San Pietro. Les dynamiques de l’islamisation en Méditerranée centrale et en Sicile. École française de Rome; 2014. pp. 165–190.	Form 3a	39.719	C12:0-C28:0	C15:0 (br and n), C17:0 (br and n), C19, C23, C21, C25	C22:1, C16:1, C18:1	1.22097	0.635633				ALK27, ALK29				0						-28.59	-29.37	-0.78	malic, tartaric, succinic, fumaric, maleic	14.95	0.53	0.034	Non-ruminant + plant wax + fruit product
Castello San Pietro (PA)	CSP	CSP_C2	Late 9th- early 10th century	Olla	Wheel thrown	Palermo	B/80	Arcifa L, Bagnera A. Islamizzazione e cultura materiale a Palermo : una riconsiderazione dei contesti ceramici di Castello - San Pietro. Les dynamiques de l’islamisation en Méditerranée centrale et en Sicile. École française de Rome; 2014. pp. 165–190.	Form 3a	83.748	C10:0-C28:0	C15:0 (br and n), C17:0 (br and n), C19, C23, C21, C25, C27	C22:1, C16:1, C18:1	0.96461	0.488595				ALK27, ALK29			TMTD, Phyt	42.7643						-28.93	-29.87	-0.94	malic, tartaric, succinic, fumaric, maleic	20.34	0.24	0.012	Non-ruminant + plant wax +fruit product
Castello San Pietro (PA)	CSP	CSP_C3	Late 9th- early 10th century	Olla	Wheel thrown	Palermo	B/6	Arcifa L, Bagnera A. Islamizzazione e cultura materiale a Palermo : una riconsiderazione dei contesti ceramici di Castello - San Pietro. Les dynamiques de l’islamisation en Méditerranée centrale et en Sicile. École française de Rome; 2014. pp. 165–190.	Form 3a	285.828	C9:0-C30:0	C15:0 (br and n), C17:0 (br and n), C19, C23, C21, C25, C27	C22:1, C16:1, C18:1	0.700612	0.298865							TMTD, Phyt	42.6086			46-54	51.32	1.42	-28.36	-31.23	-2.87	n/a	n/a	n/a	n/a	Ruminant adipose
Castello San Pietro (PA)	CSP	CSP_C4	Late 9th- early 10th century	Olla	Wheel thrown	Palermo	B/81	Arcifa L, Bagnera A. Islamizzazione e cultura materiale a Palermo : una riconsiderazione dei contesti ceramici di Castello - San Pietro. Les dynamiques de l’islamisation en Méditerranée centrale et en Sicile. École française de Rome; 2014. pp. 165–190.	Form 3a	91.5186	C8:0-C34:0	C15:0 (br and n), C17:0 (br and n), C19, C23, C21, C25, C27	C16:1, C18:1	0.692568	0.333721				ALK23, ALK25, ALK27, ALK29, ALK31, ALK33, ALK35	OH24,OH26,OH28,OH30,OH32	Methyl-DHA	Phyt	57.7014	cholesterol, β-Sitosterol	WE C16:0 (40-50)	48			-28.38	-30.25	-1.87	malic, tartaric	10.068	0.146	0.143	Ruminant adipose +plant wax +fruit product +beeswax + pine products
Castello San Pietro (PA)	CSP	CSP_C5	Late 9th- early 10th century	Olla	Wheel thrown	Palermo	B/10	Arcifa L, Bagnera A. Islamizzazione e cultura materiale a Palermo : una riconsiderazione dei contesti ceramici di Castello - San Pietro. Les dynamiques de l’islamisation en Méditerranée centrale et en Sicile. École française de Rome; 2014. pp. 165–190.	Form 3a	1121.51	C16:0-C18:0			1.04323	0						Methyl-DHA, 7-oxo-DHA, Abietic acid, Retene		0						n/a	n/a	n/a	n/a	n/a	n/a	n/a	Pine products (pitch)+ unidentified fat
Castello San Pietro (PA)	CSP	CSP_C6	Late 9th- early 10th century	Olla	Wheel thrown	Palermo	B/5	Arcifa L, Bagnera A. Islamizzazione e cultura materiale a Palermo : una riconsiderazione dei contesti ceramici di Castello - San Pietro. Les dynamiques de l’islamisation en Méditerranée centrale et en Sicile. École française de Rome; 2014. pp. 165–190.	Form 3a	142.855	C8:0-C30:0	C15:0 (br and n), C17:0 (br and n), C19, C23, C21, C25, C27	C16:1, C18:1	1.1555	0.934534		KT29 (15-nonoscanone), KT31		ALK29, ALK31, ALK33	OH22, OH24,OH26,OH28,OH30,OH32		TMTD, Phyt	56.0118	cholesterol		48			-28	-29	-1	malic, tartaric, succinic	25.28	0.377	0.147	Ruminant adipose +plant wax(brassica)+ fruit products
Castello San Pietro (PA)	CSP	CSP_C7	Late 9th- early 10th century	Lid	Wheel thrown	Palermo	B/13	Arcifa L, Bagnera A. Islamizzazione e cultura materiale a Palermo : una riconsiderazione dei contesti ceramici di Castello - San Pietro. Les dynamiques de l’islamisation en Méditerranée centrale et en Sicile. École française de Rome; 2014. pp. 165–190.	Form 12	28.55	C14:0-C24:0	C15, C17	C18:1	0.877717	0.5								0						-28.89	-29.69	-0.81	n/a	n/a	n/a	n/a	Non-ruminant
Castello San Pietro (PA)	CSP	CSP_C8	Late 9th- early 10th century	Lid	Wheel thrown	Palermo	B/13	Arcifa L, Bagnera A. Islamizzazione e cultura materiale a Palermo : una riconsiderazione dei contesti ceramici di Castello - San Pietro. Les dynamiques de l’islamisation en Méditerranée centrale et en Sicile. École française de Rome; 2014. pp. 165–190.	Form 12	25.7	C8:0-C26:0	C15:0 (br and n), C17:0 (br and n), C19, C23, C21, C25,	C18:1	0.81	0.06							TMTD	0						-29.37	-29.69	-0.32	malic, tartaric, succinic, fumaric	2.6	0.61	0.391	Non-ruminant + fruit product + grape product
Castello San Pietro (PA)	CSP	CSP_C9	Late 9th- early 10th century	Olla	Wheel thrown	Palermo	B/8	Arcifa L, Bagnera A. Islamizzazione e cultura materiale a Palermo : una riconsiderazione dei contesti ceramici di Castello - San Pietro. Les dynamiques de l’islamisation en Méditerranée centrale et en Sicile. École française de Rome; 2014. pp. 165–190.	Form 3a	35.1052	C14:0-C30:0	C15:0 (br and n), C17:0 (br and n), C19, C23, C21, C25,	C16:1, C18:1	0.869296	0							TMTD, Phyt	0						-28.89	-29.92	-1.03	malic, tartaric, succinic	0.51	traces		Non-ruminant +pine products
Castello San Pietro (PA)	CSP	CSP_C10	Late 9th- early 10th century	Olla	Wheel thrown	Palermo	B/11	Arcifa L, Bagnera A. Islamizzazione e cultura materiale a Palermo : una riconsiderazione dei contesti ceramici di Castello - San Pietro. Les dynamiques de l’islamisation en Méditerranée centrale et en Sicile. École française de Rome; 2014. pp. 165–190.	Form 3a	133.51	C12:0-C28:0	C15:0 (br and n), C17:0 (br and n), C19, C23, C21, C25,	C22:1, C16:1, C18:1	0.888717	0.297604							Phyt	41.0981						-27.46	-28.3	-0.84	malic, tartaric, succinic	0	traces		Ruminant +pine products
Castello San Pietro (PA)	CSP	CSP_C11	Late 9th- early 10th century	Olla	Wheel thrown	Palermo	B/11	Arcifa L, Bagnera A. Islamizzazione e cultura materiale a Palermo : una riconsiderazione dei contesti ceramici di Castello - San Pietro. Les dynamiques de l’islamisation en Méditerranée centrale et en Sicile. École française de Rome; 2014. pp. 165–190.	Form 3a	56.4983	C8:0-C28:0	C15:0 (br and n), C17:0 (br and n), C19, C23, C21, C25,	C22:1, C16:1, C18:1	0.862542	0.0691661								0			48-54	51.1381	1.23078	-29.52	-29.59	-0.07	malic, tartaric, succinic, fumaric, maleic	0.96	0.12	0.04	Non-ruminant
Castello San Pietro (PA)	CSP	CSP_C13	Late 9th- early 10th century	Lid	Wheel thrown	Palermo	B/16	Arcifa L, Bagnera A. Islamizzazione e cultura materiale a Palermo : una riconsiderazione dei contesti ceramici di Castello - San Pietro. Les dynamiques de l’islamisation en Méditerranée centrale et en Sicile. École française de Rome; 2014. pp. 165–190.	Form 12	61.7548	C8:0-C28:0	C15:0 (br and n), C17:0 (br and n), C19, C23, C21, C25,	C22:1, C16:1, C18:1	1.12426	0.48257					OH18, OH19, OH20, OH22, OH23, OH24, OH26, OH28, OH30		TMTD, Prist	0	cholesterol					-29.19	-29.88	-0.68	malic, tartaric, succinic, fumaric, maleic	2	0.13	0.047	Non-ruminant
Castello San Pietro (PA)	CSP	CSP_C14	Late 9th- early 10th century	Lid	Wheel thrown	Palermo	B/17	Arcifa L, Bagnera A. Islamizzazione e cultura materiale a Palermo : una riconsiderazione dei contesti ceramici di Castello - San Pietro. Les dynamiques de l’islamisation en Méditerranée centrale et en Sicile. École française de Rome; 2014. pp. 165–190.	Form 12	51.2117	C9:0-C30:0	C15:0 (br and n), C17:0 (br and n), C19, C23, C21,	C22:1 , C16:1, C18:1	0.914313	0.124827					OH18, OH19, OH20, OH22, OH23, OH24, OH26, OH28, OH30	Methyl-DHA, 7-oxo-DHA		0						-29.26	-29.73	-0.47	malic, tartaric, succinic	0	0.13	0.203	Non-ruminant + plant wax
Castello San Pietro (PA)	CSP	CSP_C15	Late 9th- early 10th century	Lid	Wheel thrown	Palermo	B/19	Arcifa L, Bagnera A. Islamizzazione e cultura materiale a Palermo : una riconsiderazione dei contesti ceramici di Castello - San Pietro. Les dynamiques de l’islamisation en Méditerranée centrale et en Sicile. École française de Rome; 2014. pp. 165–190.	Form 12	74.9058	C12:0-C24:0		C22:1, C16:1, C18:1	0.871434	0.129767						Methyl-DHA, 7-oxo-DHA	TMTD, Prist, Phyt (tr)	60.3516	cholesterol					-29.86	-29.66	0.2	malic, tartaric, succinic	0.48	0		Non-ruminant + pine products
Castello San Pietro (PA)	CSP	CSP_C16	Late 9th- early 10th century	Brazier	Wheel thrown	Palermo	B/12	Arcifa L, Bagnera A. Islamizzazione e cultura materiale a Palermo : una riconsiderazione dei contesti ceramici di Castello - San Pietro. Les dynamiques de l’islamisation en Méditerranée centrale et en Sicile. École française de Rome; 2014. pp. 165–190.	Form 7	68.9674	C9:0-C24:0	C15:0 (br and n), C17:0 (br and n)(small), C19,	C22:1, C16:1, C18:1	0.892005	0.116075				ALK25, ALK27, ALK29, ALK31, ALK33, ALK 35			TMTD, Prist	0						-28.66	-29.55	-0.89	malic, tartaric, succinic	0	0.46	0.186	Non ruminant fat
Castello San Pietro (PA)	CSP	CSP_C18	First half of 10th	Pan	Wheel thrown	Palermo	B/24	Arcifa L, Bagnera A. Islamizzazione e cultura materiale a Palermo : una riconsiderazione dei contesti ceramici di Castello - San Pietro. Les dynamiques de l’islamisation en Méditerranée centrale et en Sicile. École française de Rome; 2014. pp. 165–190.	Form 9	31.0013	C12:0-C24:0	C15:0 (br and n), C17:0 (br and n), C19, C23, C21,	C22:1, C16:1, C18:1	1.19098	0.00487867						Methyl-DHA, 7-oxo-DHA	TMTD, Prist	0						-29.9	-29.93	-0.03	malic, tartaric	0	0.07	0.121	Non-ruminant
Castello San Pietro (PA)	CSP	CSP_C19	First half of 10th	Olla	Wheel thrown	Palermo	B/9	Arcifa L, Bagnera A. Islamizzazione e cultura materiale a Palermo : una riconsiderazione dei contesti ceramici di Castello - San Pietro. Les dynamiques de l’islamisation en Méditerranée centrale et en Sicile. École française de Rome; 2014. pp. 165–190.	Form 3a	162.722	C8:0-C28:0	C15:0 (br and n), C17:0 (br and n), C19, C23, C21, C25,	C22:1, C16:1, C18:1	0.746746	0.632253					OH18,OH19,OH20,OH21,OH22,OH23,OH24,OH26			0						-28.89	-29.92	-1.03	malic, tartaric, succinic	47.632	traces		Ruminant + fruit products
Castello San Pietro (PA)	CSP	CSP_C20	First half of 10th	Olla	Wheel thrown	Palermo	B/29	Arcifa L, Bagnera A. Islamizzazione e cultura materiale a Palermo : una riconsiderazione dei contesti ceramici di Castello - San Pietro. Les dynamiques de l’islamisation en Méditerranée centrale et en Sicile. École française de Rome; 2014. pp. 165–190.	Form 3a	101.372	C8:0-C30:0	C15:0 (br and n), C17:0 (br and n), C19, C23, C21, C25,	C16:1, C18:1	0.875953	0.584813								0						-29.96	-29.8	0.16	malic, tartaric, succinic, fumaric, maleic	23.18	0.59	0.218	Non-ruminant + fruit products
Castello San Pietro (PA)	CSP	CSP_C21	First half of 10th	Olla	Wheel thrown	Palermo	B/5	Arcifa L, Bagnera A. Islamizzazione e cultura materiale a Palermo : una riconsiderazione dei contesti ceramici di Castello - San Pietro. Les dynamiques de l’islamisation en Méditerranée centrale et en Sicile. École française de Rome; 2014. pp. 165–190.	Form 3a	78.8283	C12:0-C28:0	C15:0 (br and n), C17:0 (br and n), C19, C23, C21, C25,	C22:1, C16:1 (tr) , C18:1	0.88232	0.154413								0			48-54	51.4322	1.23095	-29.95	-29.81	0.14	malic, tartaric, succinic, fumaric, maleic	2.95	0.12	0.04	Non-ruminant + fruit products
Castello San Pietro (PA)	CSP	CSP_C22	First half of 10th	Olla	Wheel thrown	Palermo	B/10	Arcifa L, Bagnera A. Islamizzazione e cultura materiale a Palermo : una riconsiderazione dei contesti ceramici di Castello - San Pietro. Les dynamiques de l’islamisation en Méditerranée centrale et en Sicile. École française de Rome; 2014. pp. 165–190.	Form 3a	74.519	C10:0-C26:0	C15:0 (br and n), C17:0 (br and n), C19,C23,C21	C22:1, C16:1, C18:1	0.886131	0.127678								0	cholesterol					-30.38	-29.86	0.52	n/a	n/a	n/a	n/a	Non- ruminant
Castello San Pietro (PA)	CSP	CSP_C23	First half of 10th	Olla	Wheel thrown	Palermo	B/28	Arcifa L, Bagnera A. Islamizzazione e cultura materiale a Palermo : una riconsiderazione dei contesti ceramici di Castello - San Pietro. Les dynamiques de l’islamisation en Méditerranée centrale et en Sicile. École française de Rome; 2014. pp. 165–190.	Form 3a	101.388	C10:0-C28:0	C9:0, C15:0 (br and n), C17:0 (br and n), C19, C23, C21,	C22:1, C16:1, C18:1	0.905687	0.204172				ALK21, ALK23, ALK25, ALK27, ALK29, ALK31, ALK33			TMTD, Prist	0						-30.02	-29.9	0.12	malic, tartaric	7.165	0.12	0.017	Non-ruminant + fruit products
Castello San Pietro (PA)	CSP	CSP_C24	First half of 10th	Olla	Wheel thrown	Palermo	B/10	Arcifa L, Bagnera A. Islamizzazione e cultura materiale a Palermo : una riconsiderazione dei contesti ceramici di Castello - San Pietro. Les dynamiques de l’islamisation en Méditerranée centrale et en Sicile. École française de Rome; 2014. pp. 165–190.	Form 3a	31.0013	C12:0-C24:0	C15:0 (br and n), C17:0 (br and n)?(tr)	C22:1, C16:1, C18:1	0.879972	0.155342							TMTD, Phyt	54.6839	cholesterol					-30.1	-29.86	0.24	malic, tartaric	2.12	0.12	0.017	Non-ruminant + fruit products
Castello San Pietro (PA)	CSP	CSP_C25	First half of 10th	Olla	Wheel thrown	Palermo	B/10	Arcifa L, Bagnera A. Islamizzazione e cultura materiale a Palermo : una riconsiderazione dei contesti ceramici di Castello - San Pietro. Les dynamiques de l’islamisation en Méditerranée centrale et en Sicile. École française de Rome; 2014. pp. 165–190.	Form 3a	68.5458	C12:0-C26:0	C9:0, C15:0 (br and n), C17:0 (br and n), C19, C23, C21,	C22:1, C16:1, C18:1	0.844908	0.119502								0						-29.94	-29.87	0.06		0	traces		Non- ruminant
Castello San Pietro (PA)	CSP	CSP_C33b	First half of 10th	Stone plate	Wheel thrown	Palermo		Arcifa L, Bagnera A. Islamizzazione e cultura materiale a Palermo : una riconsiderazione dei contesti ceramici di Castello - San Pietro. Les dynamiques de l’islamisation en Méditerranée centrale et en Sicile. École française de Rome; 2014. pp. 165–190.	Form 6	37.7336	C15:0-C26:0	C9:0, C15:0 (br and n), C17:0 (br and n), C19	C18:1	0.533614	0.0567125								0			48-54	51.76	1.11	-28.43	-29.58	-1.15	n/a	n/a	n/a	n/a	Ruminant adipose + unidentified plant

## Sheet: Gancia Church (GA)
Site		Sample information									Fatty acids					Ketones and APAAs			Alkanes and alcohols		Diterpenes	Isoprenoids	SRR%	Sterols	Wax esters	TAGs			GC-C-IRMS			Fruit carboxylic acids	Malic acid yield (µg/g)	Tartaric acid yield (µg/g)	%TA	Summary substance identification
Site name	Site code	Sample code	Chronology	Form	Technology	Provinance	Inventory number/ original form code	Reference for ceramic study	Form Id	yield (µg/g)	sat. even-numb.	sat. odd-numb.	unsaturated	P/S (ug)	O/S (ug)	High temp. KT	Plant KT	APPAs	Alkanes	Alcohols (TMS)						Carbon number	Average carbon number (M)	Dispersion factor (DF)	δ 13C16:0 (‰)	δ 13C18:0 (‰)	Δ13C (C18:0-C16:0)
La Gancia (PA)	GA	GA_C9	Late 10th - early 11th century	Olla	Wheel thrown	Palermo	GA2201	Ardizzone F, Pezzini E, Sacco V. Lo scavo della chiesa di Santa Maria degli Angeli alla Gancia: indicatori archeologici della prima età islamica a Palermo. 2014. Available: https://iris.unipa.it/handle/10447/96068	Form 3a	121.677	C8:0-C28:0	C15:0 (br and n), C17:0 (br and n), C19, C23, C21, C25	C16:1, C18:1, C20:1	0.875355	0.24362		KT29 (15-nonoscanone)	18	ALK29	OH20, OH22, OH24, OH26, OH28, OH29, OH30				cholesterol					-30.0489	-29.7028	0.346083	malic, tartaric (tr)	0.728	traces		Non-ruminant + plant waxes (Brassica) +heating
La Gancia (PA)	GA	GA_C10	Late 10th - early 11th century	Olla	Wheel thrown	Palermo	GA2203	Ardizzone F, Pezzini E, Sacco V. Lo scavo della chiesa di Santa Maria degli Angeli alla Gancia: indicatori archeologici della prima età islamica a Palermo. 2014. Available: https://iris.unipa.it/handle/10447/96069	Form 3a	50.561	C8:0-C30:0	C15:0 (br and n), C17:0 (br and n), C19, C23, C21, C25	C16:1, C18:1 C22:1, C20:1(tr)	0.829518	0.183311		KT29 (15-nonoscanone)	16	ALK29, ALK31	OH20, OH22, OH24, OH26, OH28, OH29, OH30		TMTD, Prist, Phyt (tr)	59.5872	cholesterol		48-54	51.18	1.23	-28.4043	-29.2036	-0.799345	malic, tartaric (tr)	0.759	traces		Non-ruminant + plant waxes (Brassica) +heating
La Gancia (PA)	GA	GA_C11	Late 10th - early 11th century	Olla	Wheel thrown	Palermo	GA2202	Ardizzone F, Pezzini E, Sacco V. Lo scavo della chiesa di Santa Maria degli Angeli alla Gancia: indicatori archeologici della prima età islamica a Palermo. 2014. Available: https://iris.unipa.it/handle/10447/96070	Form 3a	185.951	C8:0-C24:0	C15:0 (br and n), C17:0 (br and n), C19, C23, C21,	C16:1, C18:1, C18:2, C22:1	0.921651	0.123075		KT29 (15-nonoscanone)		ALK29	12OH, 26OH, 28OH		TMTD, Prist		cholesterol					-29.6687	-29.5277	0.141058	malic, tartaric, succinic	5.541	0.36	0.061	Non-ruminant + plant waxes (Brassica) + fruit +heating
La Gancia (PA)	GA	GA_C12b	Late 10th - early 11th century	Olla	Wheel thrown	Palermo	GA549	Ardizzone F, Pezzini E, Sacco V. Lo scavo della chiesa di Santa Maria degli Angeli alla Gancia: indicatori archeologici della prima età islamica a Palermo. 2014. Available: https://iris.unipa.it/handle/10447/96071	Form 3a	42.6	C12:0-C28:0	C15:0 (br and n), C17:0 (br and n), C25	C16:1, C18:1,C22:1	0.93668	0.0940637					14OH, 16OH, 18OH		TMTD, Prist		cholesterol					-29.6789	-29.2282	0.450694	malonic, oxalic	0	0		Non-ruminant
La Gancia (PA)	GA	GA_C13	Late 10th - early 11th century	Olla	Wheel thrown	Palermo	GA545	Ardizzone F, Pezzini E, Sacco V. Lo scavo della chiesa di Santa Maria degli Angeli alla Gancia: indicatori archeologici della prima età islamica a Palermo. 2014. Available: https://iris.unipa.it/handle/10447/96072	Form 3a	122.959	C8:0-C30:0	C15:0 (br and n), C17:0 (br and n), C19, C23, C21, C25 ,C27	C16:1, C18:1,	0.880339	0.562874		KT29 (15-nonoscanone)	16	ALK29	12OH, 14OH, 16OH, 18OH, OH20, OH22, OH24, OH26, OH28, OH30		TMTD, Phyt	43.4764	cholesterol		48-54	50.71	1.34	-27.7044	-28.7295	-1.02506	malic, tartaric, succinic, fumaric	18.53	0.25	0.014	Ruminant + plant waxes (Brassica) + fruit +heating
La Gancia (PA)	GA	GA_C14	Late 10th - early 11th century	Olla	Wheel thrown	Palermo	GA546	Ardizzone F, Pezzini E, Sacco V. Lo scavo della chiesa di Santa Maria degli Angeli alla Gancia: indicatori archeologici della prima età islamica a Palermo. 2014. Available: https://iris.unipa.it/handle/10447/96073	Form 3a	161.425	C10:0-C30	C15:0 (br and n), C17:0 (br and n), C19, C23, C21, C25	C16:1, C18:1, C22:1	0.830254	0.57208			16,18		26OH		TMTD, Phyt	58.9537			46-54	50.46	1.49	-28.1413	-29.58	-1.43875	malic, tartaric, succinic	12.4	0.38	0.029	Ruminant adipose +plant waxes (Brassica) + fruit +heating
La Gancia (PA)	GA	GA_C15	Late 10th - early 11th century	Olla	Wheel thrown	Palermo	GA539	Ardizzone F, Pezzini E, Sacco V. Lo scavo della chiesa di Santa Maria degli Angeli alla Gancia: indicatori archeologici della prima età islamica a Palermo. 2014. Available: https://iris.unipa.it/handle/10447/96074	Form 3a	13.0183	C14:0-C26:0	C15:0 (br and n), C17:0 (br and n), C19, C23, C21, C25	C16:1, C18:1, C22:1	0.860364	0.192115					28OH				cholesterol					-28.5065	-29.0846	-0.578053	malic, tartaric	1.144	0.22	0.162	Non-ruminant + fruit
La Gancia (PA)	GA	GA_C16	Late 10th - early 11th century	pan	Wheel thrown	Palermo	GA552	Ardizzone F, Pezzini E, Sacco V. Lo scavo della chiesa di Santa Maria degli Angeli alla Gancia: indicatori archeologici della prima età islamica a Palermo. 2014. Available: https://iris.unipa.it/handle/10447/96075	Form 9	14.5705	C12:0-C18:0		C18:1	1.48335	0.115485							TMTD, Prist							n/a	n/a	n/a					UI Below limit of interpretation
La Gancia (PA)	GA	GA_C17	Late 10th - early 11th century	pan	Wheel thrown	Palermo	GA551	Ardizzone F, Pezzini E, Sacco V. Lo scavo della chiesa di Santa Maria degli Angeli alla Gancia: indicatori archeologici della prima età islamica a Palermo. 2014. Available: https://iris.unipa.it/handle/10447/96076	Form 9	23.2061	C12:0-C18:0			1.29797	0														n/a	n/a	n/a					UI Below limit of interpretation
La Gancia (PA)	GA	GA_C18	Late 9th- early 10th century	Olla	Wheel thrown	Palermo	GA17	Ardizzone F, Pezzini E, Sacco V. Lo scavo della chiesa di Santa Maria degli Angeli alla Gancia: indicatori archeologici della prima età islamica a Palermo. 2014. Available: https://iris.unipa.it/handle/10447/96077	Form 3a	41.5908	C12:0-C26:0	C15:0 (br and n), C17:0 (br and n)	C22:1, C16:1, C18:1	0.892276	0.0509219			18	ALK29	OH18, OH20		Prist							-30.3504	-29.5769	0.773454	malic, tartaric (tr), succinic	2.205	traces		Non-ruminant + plant waxes + fruit +heating
La Gancia (PA)	GA	GA_C19	Late 9th- early 10th century	Olla	Wheel thrown	Palermo	GA67	Ardizzone F, Pezzini E, Sacco V. Lo scavo della chiesa di Santa Maria degli Angeli alla Gancia: indicatori archeologici della prima età islamica a Palermo. 2014. Available: https://iris.unipa.it/handle/10447/96078	Form 3a	22.1335	C12:0-C28:0	C15:0 (br and n), C17:0 (br and n), C25:0, C19:0	C22:1, C16:1, C18:1	0.872181	0.0978256			18		12OH, 14OH, 16OH, 18OH		TMTD, Prist		cholesterol					-28.969	-28.969	1.83541e-05	malic	0.31	0	0	Non-ruminant + heating
La Gancia (PA)	GA	GA_C20b	Late 9th- early 10th century	Olla	Wheel thrown	Palermo	GA7	Ardizzone F, Pezzini E, Sacco V. Lo scavo della chiesa di Santa Maria degli Angeli alla Gancia: indicatori archeologici della prima età islamica a Palermo. 2014. Available: https://iris.unipa.it/handle/10447/96079	Form 8	372.03	C10:0-C30	C15:0 (br and n), C17:0 (br and n), C19, C23, C21, C25	C22:1, C16:1, C18:1	0.732015	0.432608							TMTD, Phyt	51.5252			46-54	50.97	1.42	-30.1951	-31.2668	-1.07164	malic, tartaric (tr), succinic, fumaric	9.404	traces		Ruminant + unidentified plant + fruit + heating
La Gancia (PA)	GA	GA_C21	Late 9th- early 10th century	Olla	Wheel thrown	Palermo	GA40	Ardizzone F, Pezzini E, Sacco V. Lo scavo della chiesa di Santa Maria degli Angeli alla Gancia: indicatori archeologici della prima età islamica a Palermo. 2014. Available: https://iris.unipa.it/handle/10447/96080	Form 3a	333.721	C10:0-C18:0	C15:0 (br and n), C17:0 (br and n)	C18:1	0.856401	0.175177									cholesterol		42-54	50.97	1.53	-27.5687	-30.3099	-2.74115	malic, tartaric (tr), succinic, fumaric	6.136	traces		Ruminant + fruit
La Gancia (PA)	GA	GA_C22	Late 9th- early 10th century	Olla	Wheel thrown	Palermo	GA18	Ardizzone F, Pezzini E, Sacco V. Lo scavo della chiesa di Santa Maria degli Angeli alla Gancia: indicatori archeologici della prima età islamica a Palermo. 2014. Available: https://iris.unipa.it/handle/10447/96081	Form 3a	35.94	C12:0-C26:0	C15:0 (br and n), C17:0 (br and n), C19, C23, C21, C25	C22:1, C16:1, C18:1	1.10606	0.621874		KT29 (15-nonoscanone)		ALK25, ALK27, ALK29, ALK31		Methyl-DHA, 7-oxo-DHA	TMTD, Prist, Phyt	51.5486	cholesterol					-27.928	-29.1059	-1.17788	malic, tartaric (tr), succinic	1.016	traces		Ruminant adipose +plant waxes (Brassica) + pine products+ fruit
La Gancia (PA)	GA	GA_C23	Late 9th- early 10th century	Olla	Wheel thrown	Palermo	GA19	Ardizzone F, Pezzini E, Sacco V. Lo scavo della chiesa di Santa Maria degli Angeli alla Gancia: indicatori archeologici della prima età islamica a Palermo. 2014. Available: https://iris.unipa.it/handle/10447/96082	Form 3a	26.6486	C14:0-C28:0	C15:0 (br and n), C17:0 (br and n), C19, C23, C21, C25	C16:1, C18:1, C20:1, C22:1	0.850182	0.209381					22OH, 26OH		TMTD, Prist		cholesterol					-27.7266	-28.6803	-0.953685					Non-ruminant
La Gancia (PA)	GA	GA_C24	Late 9th- early 10th century	Stone pot	Wheel thrown	?		Ardizzone F, Pezzini E, Sacco V. Lo scavo della chiesa di Santa Maria degli Angeli alla Gancia: indicatori archeologici della prima età islamica a Palermo. 2014. Available: https://iris.unipa.it/handle/10447/96083	Form 10	29.7731	C10:0-C26:0	C15:0 (br and n), C17:0 (br and n), C19, C23, C21, C25	C18:1	0.935551	0.182346			18				TMTD, Phyt	53.4182						-27.2092	-27.9476	-0.738436					Non-ruminant
La Gancia (PA)	GA	GA_C25	Late 9th- early 10th century	Lid	Wheel thrown	Palermo		Ardizzone F, Pezzini E, Sacco V. Lo scavo della chiesa di Santa Maria degli Angeli alla Gancia: indicatori archeologici della prima età islamica a Palermo. 2014. Available: https://iris.unipa.it/handle/10447/96084	Form 12	286.17	C8:0-C30:0	C15:0 (br and n), C17:0 (br and n), C19, C23, C21, C25	C16:1. C18:1	0.723199	0.575792			18	ALK25, ALK27, ALK29, ALK31			TMTD, Phyt	57.8763						-28.5308	-30.0091	-1.47832	malic	1.307	0	0	Ruminant adipose + fruit+ heating
La Gancia (PA)	GA	GA_C26	Late 9th- early 10th century	Cooking pot	Wheel thrown	Calcitic*		Ardizzone F, Pezzini E, Sacco V. Lo scavo della chiesa di Santa Maria degli Angeli alla Gancia: indicatori archeologici della prima età islamica a Palermo. 2014. Available: https://iris.unipa.it/handle/10447/96085	Form 2	51.9821	C8:0-C26:0	C15:0 (br and n), C17:0 (br and n), C19, C23, C21, C25	C16:1. C18:1	0.992442	0.239909			18				TMTD, Phyt	55.7948						-28.909	-29.73	-0.821012	oxalic, succinic	0	0		Non-ruminant + heating
La Gancia (PA)	GA	GA_C27	Late 9th- early 10th century	Olla	Wheel thrown	Palermo	GA31	Ardizzone F, Pezzini E, Sacco V. Lo scavo della chiesa di Santa Maria degli Angeli alla Gancia: indicatori archeologici della prima età islamica a Palermo. 2014. Available: https://iris.unipa.it/handle/10447/96086	Form 3a	111.423	C12:0-C30	C15:0 (br and n), C17:0 (br and n), C19, C23, C21, C25	C18:1	0.895298	0.591107		KT29 (15-nonoscanone)	18	ALK29	OH18, OH20, OH22, OH24, OH26, OH28, OH30		TMTD, Phyt	57.1135						-29.2677	-30.1512	-0.883536	malic, tartaric, succinic, fumaric	36.8	1.36	0.036	Non-ruminant + plant wax (Brassica)+ fruit + heating
La Gancia (PA)	GA	GA_C28	Late 10th century	Olla	Wheel thrown	Palermo	GA485	Ardizzone F, Pezzini E, Sacco V. Lo scavo della chiesa di Santa Maria degli Angeli alla Gancia: indicatori archeologici della prima età islamica a Palermo. 2014. Available: https://iris.unipa.it/handle/10447/96087	Form 3a	52.9806	C10:0-C30	C15:0 (br and n), C17:0 (br and n), C19, C23, C21, C25	C16:1. C18:1, 22:1, 21:1	1.03853	0.379412							TMTD, Prist, Phyt	53.0829	cholesterol, parietin					-28.3514	-29.9311	-1.57977	malic, tartaric (tr), succinic	0.926	traces		Ruminant adipose
La Gancia (PA)	GA	GA_C29	Late 10th century	Olla	Wheel thrown	Palermo	GA483	Ardizzone F, Pezzini E, Sacco V. Lo scavo della chiesa di Santa Maria degli Angeli alla Gancia: indicatori archeologici della prima età islamica a Palermo. 2014. Available: https://iris.unipa.it/handle/10447/96088	Form 3a	121.386	C8:0-C30:0	C15:0 (br and n), C17:0 (br and n), C19, C23, C21, C25	C16:1. C18:1, 18:2	0.79635	0.145666					12OH		TMTD, Phyt	62.7357	cholesterol					-28.1234	-29.8624	-1.73903	malic, tartaric, succinic	1.432	0.54	0.274	Ruminant adipose + fruit
La Gancia (PA)	GA	GA_C30	Late 10th century	Cooking pot	Wheel thrown	Calcitic*		Ardizzone F, Pezzini E, Sacco V. Lo scavo della chiesa di Santa Maria degli Angeli alla Gancia: indicatori archeologici della prima età islamica a Palermo. 2014. Available: https://iris.unipa.it/handle/10447/96089	Form 2	34.2063	C12:0-C22:0	C15:0 (br and n), C17:0 (br and n), C19, C23, C21, C25. C27	C16:1. C18:1, 22:1,	1.07892	0.104791			18		28OH						50-54	49.97	1.1	-28.5209	-30.0224	-1.50153	succinic, oxalic	0	0		Ruminant adipose + heating
La Gancia (PA)	GA	GA_C31	Late 10th century	Lid	Wheel thrown	Palermo	GA483	Ardizzone F, Pezzini E, Sacco V. Lo scavo della chiesa di Santa Maria degli Angeli alla Gancia: indicatori archeologici della prima età islamica a Palermo. 2014. Available: https://iris.unipa.it/handle/10447/96090	Form 12	113.244	C8:0-C28:0	C15:0 (br and n), C17:0 (br and n), C19, C23, C21, C25	C16:1, C18:1	0.927766	0.184565			18				TMTD		cholesterol, β-Sitosterol					-29.9646	-29.7808	0.183846	malic, tartaric (tr), succinic	3.886	traces		Non- ruminant +fruit
La Gancia (PA)	GA	GA_C32	Late 10th century	Pan	Wheel thrown	Palermo	GA484	Ardizzone F, Pezzini E, Sacco V. Lo scavo della chiesa di Santa Maria degli Angeli alla Gancia: indicatori archeologici della prima età islamica a Palermo. 2014. Available: https://iris.unipa.it/handle/10447/96091	Form 9	9.07073	C12:0-C18:0		C18:1	1.72859	0.0849232							TMTD, Prist							n/a	n/a	n/a					UI Below limit of interpretation
La Gancia (PA)	GA	GA_C33	Late 10th century	Stone plate	Wheel thrown	?	GA484	Ardizzone F, Pezzini E, Sacco V. Lo scavo della chiesa di Santa Maria degli Angeli alla Gancia: indicatori archeologici della prima età islamica a Palermo. 2014. Available: https://iris.unipa.it/handle/10447/96092	Form 6	9.78425	C12:0-C18:0	C15:0 (tr)	C18:1 (tr)	0.889059	0.0417354							TMTD							n/a	n/a	n/a					UI Below limit of interpretation
La Gancia (PA)	GA	GA_C34	Late 10th century	Olla	Wheel thrown	Palermo	GA480	Ardizzone F, Pezzini E, Sacco V. Lo scavo della chiesa di Santa Maria degli Angeli alla Gancia: indicatori archeologici della prima età islamica a Palermo. 2014. Available: https://iris.unipa.it/handle/10447/96093	Form 3a	167.102	C8:0-C30:0	C15:0 (br and n), C17:0 (br and n), C19, C23, C21, C25. C27	C18:1, C22:1, C16:1	1.15729	1.04843							TMTD, Phyt	62.6038						-27.8098	-30.9236	-3.11375					Ruminant adipose
															*unknown provinence

## Sheet: Palazzo Bonagia (PB)
Site		Sample information									Fatty acids					Ketones and APAAs			Alkanes and alcohols		Diterpenes	Isoprenoids	SRR%	Sterols	Wax esters	TAGs			GC-C-IRMS			Fruit carboxylic acids	Malic acid yield (µg/g)	Tartaric acid yield (µg/g)	%TA	Summary substance identification
Site name	Site code	Sample code	Chronology	Form	Technology	Provinance	Inventory number/ original form code	Reference for ceramic study	Form Id	yield (µg/g)	sat. even-numb.	sat. odd-numb.	unsaturated	P/S (ug)	O/S (ug)	High temp. KT	Plant KT	APPAs	Alkanes	Alcohols (TMS)						Carbon number	Average carbon number (M)	Dispersion factor (DF)	δ 13C16:0 (‰)	δ 13C18:0 (‰)	Δ13C (C18:0-C16:0)
Palazzo Bonagia (PA)	PB	PB_C25	late 10th- early 11th century	Olla	Wheel thrown	Palermo	PB468	Sacco V. L’islamizzazione a Palermo attraverso due contesti di palazzo Bonagia (scavi di Stefano). 2014; 225–231.	Form 3a	144.079	C14:0-C28:0	C15:0, C17 (n and br),		0.85743	0.0479933									cholesterol					-30.12	-29.51	0.6	malic, tartaric	0.174	0.04	0.204	Non-ruminant
Palazzo Bonagia (PA)	PB	PB_C26	Second half of 10th century	Olla	Wheel thrown	Palermo	PB519	Sacco V. L’islamizzazione a Palermo attraverso due contesti di palazzo Bonagia (scavi di Stefano). 2014; 225–231.	Form 3a	44.1403	C14:0-C28:0	C15:0 (br and n), C17:0	C18:1	0.87955	0.235741		KT31		ALK31, ALK 27 , 29 , 25	OH18, OH19, OH20, OH22, OH24, OH26, OH28, OH30	Methyl-DHA	TMTD, Phyt	60.005	cholesterol stigmasterol, β-Sitosterol					-29.41	-30.33	-0.92	malic, tartaric(tr)	1.298	traces	0	Non-ruminant+ plant waxes (leek)+ pine products + fruit
Palazzo Bonagia (PA)	PB	PB_C27	10th -11th century	Olla	Wheel thrown	Palermo	PB609	Sacco V. L’islamizzazione a Palermo attraverso due contesti di palazzo Bonagia (scavi di Stefano). 2014; 225–231.	Form 3a	70.8658	C16:0-C18:0		C18:1	0.77242	0.130366				ALK 30, ALK 32	OH 12, OH 14, OH 16, OH18,OH20, OH21, OH22, OH24, OH26, OH28, OH30	Methyl-DHA, Methyl-6-DHA, 7-oxo-DHA			campersterol, cholesterol, stigmasterol, β-Sitosterol		42			-28.19	-28.93	-0.74	malic, tartaric,succinic	1.285	0.31	0.195	Non-ruminant + unidentified plant + pine products + fruit
Palazzo Bonagia (PA)	PB	PB_C28	Late 9th - early 10th century	Olla	Wheel thrown	Palermo	PB155	Sacco V. L’islamizzazione a Palermo attraverso due contesti di palazzo Bonagia (scavi di Stefano). 2014; 225–231.	Form 3a	0.121158				0.468254															n/a	n/a	n/a	n/a				UI Below limit of interpretation
Palazzo Bonagia (PA)	PB	PB_C29	Late 9th - early 10th century	Olla	Wheel thrown	Palermo	PB160	Sacco V. L’islamizzazione a Palermo attraverso due contesti di palazzo Bonagia (scavi di Stefano). 2014; 225–231.	Form 3a	24.4744	C14:0-C24:0	C15:0 (br and n), C17:0, C19:0	C18:1	0.7	0.06							TMTD, Phyt	52.4494						-28.12	-29.28	-1.15	n/a				Ruminant adipose
Palazzo Bonagia (PA)	PB	PB_C30	Late 9th - early 10th century	Olla	Wheel thrown	Palermo	PB151	Sacco V. L’islamizzazione a Palermo attraverso due contesti di palazzo Bonagia (scavi di Stefano). 2014; 225–231.	Form 3a	41.3595	C14:0-C24:0	C15:0 (br and n), C17:0	C18:1	0.47	0.04				ALK 29 (tr)			Phyt	67.5027	cholesterol		48-54	51.23	1.58	-28.14	-28.69	-0.55	malic, tartaric,succinic	0.758	0.11	0.132	Non-ruminant
Palazzo Bonagia (PA)	PB	PB_C31	late 10th- early 11th century	Olla	Wheel thrown	Palermo	PB108	Sacco V. L’islamizzazione a Palermo attraverso due contesti di palazzo Bonagia (scavi di Stefano). 2014; 225–231.	Form 3a	22.0504	C14:0-C28:0	C15:0	C18:1	0.79	0.13									cholesterol					-29.35	-29.74	-0.4	malic, tartaric	0.396	0.16	0.293	Non-ruminant
Palazzo Bonagia (PA)	PB	PB_C32	Second half of 10th century	Olla	Wheel thrown	Palermo	PB891	Sacco V. L’islamizzazione a Palermo attraverso due contesti di palazzo Bonagia (scavi di Stefano). 2014; 225–231.	Form 3a	1.11812				0.69	0														n/a	n/a	n/a	n/a				UI Below limit of interpretation
Palazzo Bonagia (PA)	PB	PB_C33	Second half of 10th century	Olla	Wheel thrown	Palermo	PB25	Sacco V. L’islamizzazione a Palermo attraverso due contesti di palazzo Bonagia (scavi di Stefano). 2014; 225–231.	Form 3a	2.31824	C16:0-C18:0		C18:1	0.92	0					OH16									n/a	n/a	n/a	malic, tartaric	0.921	0.43	0.317	UI Below limit of interpretation
Palazzo Bonagia (PA)	PB	PB_C34	Second half of 10th century	Olla	Wheel thrown	Palermo	PB16	Sacco V. L’islamizzazione a Palermo attraverso due contesti di palazzo Bonagia (scavi di Stefano). 2014; 225–231.	Form 3a	51.4921	C14:0-C24:0	C15:0 (br and n), C17:0	C18:1	0.68	0.04				ALK 29, ALK 27 ,			Phyt	55.3271	cholesterol		46-54	51.21	1.28	-27.56	-28.94	-1.38	malic, tartaric (tr)	0.368	traces		Ruminant adipose
Palazzo Bonagia (PA)	PB	PB_C35	Second half of 10th century	Olla	Wheel thrown	Palermo	PB518	Sacco V. L’islamizzazione a Palermo attraverso due contesti di palazzo Bonagia (scavi di Stefano). 2014; 225–231.	Form 3a	1.27319				0.53	0														n/a	n/a	n/a	malic	0.184	0	0	UI Below limit of interpretation
Palazzo Bonagia (PA)	PB	PB_C36	11th century	Olla	Wheel thrown	Palermo	PB948	Sacco V. L’islamizzazione a Palermo attraverso due contesti di palazzo Bonagia (scavi di Stefano). 2014; 225–231.	Form 3a	17.0273	C14:0-C22:0	C15:0 C17:0	C18:1	0.6	0.05						Methyl-DHA			cholesterol		42-54	51.24	1.59	-28.22	-29.79	-1.57	malic	0.262	0	0	Ruminant adipose + pine products
Palazzo Bonagia (PA)	PB	PB_C37	Late 10th- early 11th century	Olla	Wheel thrown	Palermo	PB464	Sacco V. L’islamizzazione a Palermo attraverso due contesti di palazzo Bonagia (scavi di Stefano). 2014; 225–231.	Form 3a	2.71322	C16:0-C18:0		C18:1	0.73	0					OH18									n/a	n/a	n/a	malic	0.221	0	0	UI Below limit of interpretation
Palazzo Bonagia (PA)	PB	PB_C38	11th century	Olla	Wheel thrown	Palermo	PB949	Sacco V. L’islamizzazione a Palermo attraverso due contesti di palazzo Bonagia (scavi di Stefano). 2014; 225–231.	Form 3a	9.02262	C16:0-C18:0		C18:1	0.6	0.11				ALK 29	OH18, OH19, OH20, OH22, OH24, OH26, OH28, OH30	Methyl-DHA	Phyt	47.1801	cholesterol					-28.06	-28.97	-0.91	n/a				Non- ruminant + unidentified plant wax + pine products
Palazzo Bonagia (PA)	PB	PB_C39	10th -11th century	Olla	Wheel thrown	Sicilia occidentale	PB559	Sacco V. L’islamizzazione a Palermo attraverso due contesti di palazzo Bonagia (scavi di Stefano). 2014; 225–231.	Form 3a	70.1095	C14:0-C26:0	C15:0 C17:0 (n and br)	C18:1,C18:2	0.76	0.35			18				Phyt	51.1424	cholesterol, β-Sitosterol		48-54	51.38	1.28	-27.55	-29.15	-1.6	malic, succinic	1.7753	0	0	Ruminant adipose + unidentified plant + fruit + heating
Palazzo Bonagia (PA)	PB	PB_C40	Second half of 10th century	Olla	Wheel thrown	Palermo	PB23	Sacco V. L’islamizzazione a Palermo attraverso due contesti di palazzo Bonagia (scavi di Stefano). 2014; 225–231.	Form 3a	79.8404	C8:0-C26:0	C15:0 (br and n), C17:0 (br and n), C19, C23, C21, C25	C18:1	0.702404	0.128612														-28.5	-29.66	-1.15	n/a				Ruminant adipose
Palazzo Bonagia (PA)	PB	PB_C41	Late 10th- early 11th century	Olla	Wheel thrown	Palermo	PB223	Sacco V. L’islamizzazione a Palermo attraverso due contesti di palazzo Bonagia (scavi di Stefano). 2014; 225–231.	Form 3a	71.4024	C14:0-C24:0	C15:0, C17:0	C18:1, C22:1	0.783206	0.110446									cholesterol					-30	-30.03	-0.04	malic	0.252	0	0	Non-ruminant
Palazzo Bonagia (PA)	PB	PB_C42	Second half of 10th century	Olla	Wheel thrown	Palermo	PB895	Sacco V. L’islamizzazione a Palermo attraverso due contesti di palazzo Bonagia (scavi di Stefano). 2014; 225–231.	Form 3a	170.78	C14-C26:0	C15:0 (br and n), C17:0 (br and n), C19, C23, C21, C25	C18:1	1.02	0.19									β-Sitosterol	WE C16:0, C18:0, C20:0, C22:0	48-54	50.87	1.35	-29.068	-30.217	-1.149	malic	0.262	0	0	Ruminant adipose + plant
Palazzo Bonagia (PA)	PB	PB_C44	Second half of 10th century	Olla	Wheel thrown	Palermo	PB984	Sacco V. L’islamizzazione a Palermo attraverso due contesti di palazzo Bonagia (scavi di Stefano). 2014; 225–231.	Form 3a	127.4	C14-C26:0	C15:0 (br and n), C17:0 (br and n), C19, C23, C21, C25	C16:1, C18:1, C20:1, C22:1	0.97	0.58														-28.857	-29.827	-0.97	malic	0.831	0	0	Non-ruminant
Palazzo Bonagia (PA)	PB	PB_C45	Second half of 10th century	Olla	Wheel thrown	Palermo	PB42	Sacco V. L’islamizzazione a Palermo attraverso due contesti di palazzo Bonagia (scavi di Stefano). 2014; 225–231.	Form 3a	140.67	C14-C26:0	C15:0 (br and n), C17:0 (br and n), C19, C23, C21, C25	C16:1, C18:1, C22:1	0.72	0.15														-29.665	-30.3	-0.636	malic,tartaric	3.129	0.07	0.021	Non-ruminant + fruit
Palazzo Bonagia (PA)	PB	PB_C46	Early Islamic	Olla	Wheel thrown	Palermo	PB44	Sacco V. L’islamizzazione a Palermo attraverso due contesti di palazzo Bonagia (scavi di Stefano). 2014; 225–231.	Form 3a	58.538	C12:0-C28:0	C15:0 (br and n), C17:0 (br and n), C19, C23, C21, C25	C16:1, C18:1, C20:1, C22:1	0.900143	0.406747				ALK25, ALK27, ALK29, ALK 31	OH18, OH19, OH20, OH22, OH24, OH26, OH28, OH30				cholesterol					-28.97	-30.21	-1.25	n/a	n/a	n/a	n/a	Ruminant adipose
Palazzo Bonagia (PA)	PB	PB_C47	Late 9th - early 19th century	Olla	Wheel thrown	Palermo	PB175	Sacco V. L’islamizzazione a Palermo attraverso due contesti di palazzo Bonagia (scavi di Stefano). 2014; 225–231.	Form 3a	70.4129	C8:0-C28:0	C15:0 (br and n), C17:0 (br and n), C19, C23, C21, C25	C18:1 (small peak), C22:1	0.809564	0.0756029		KT29 (15 nonoscanone)		ALK27, ALK29, ALK31	OH18, OH19, OH20, OH22, OH24, OH26, OH28, OH30		TMTD, Phyt	59.9641						-27.35	-29.18	-1.82	n/a	n/a	n/a	n/a	Ruminant adipose + plant wax (Brassica)
Palazzo Bonagia (PA)	PB	PB_C48	Late 10th- early 11th century	Cooking pot	Slow thrown	Calcitic	PB148	Sacco V. L’islamizzazione a Palermo attraverso due contesti di palazzo Bonagia (scavi di Stefano). 2014; 225–231.	Form 2	115.997	C8:0-C26:0	C15:0 (br and n), C17:0 (br and n) quite dominant, C19, C23, C21, C25	C16:1, C18:1,	0.657191	0.346178							TMTD		cholesterol					-28.05	-29.05	-1	n/a	n/a	n/a	n/a	Ruminant
Palazzo Bonagia (PA)	PB	PB_C49	Late 10th- early 11th century	Cooking pot	Slow thrown	Calcitic	PB483	Sacco V. L’islamizzazione a Palermo attraverso due contesti di palazzo Bonagia (scavi di Stefano). 2014; 225–231.	Form 2	52.333	C8:0-C26:0	C15:0 (br and n), C17:0 (br and n), C19, C23, C21, C25	C18:1	0.978196	1							TMTD, Phyt	68.8121						-27.48	-28.89	-1.41	n/a	n/a	n/a	n/a	Ruminant adipose + plant wax (Brassica)
Palazzo Bonagia (PA)	PB	PB_C50	Late 10th- early 11th century	Partially glazed Cooking pot	Wheel thrown	East Sicily	PB482	Sacco V. L’islamizzazione a Palermo attraverso due contesti di palazzo Bonagia (scavi di Stefano). 2014; 225–231.	Form 8	25.4023	C14:0-C24:0	C15:0 (br and n), C17:0 (br and n), C19, C23, C21	C18:1, C22:1	0.693411	0.0771689									cholesterol					-29.98	-30.14	-0.16	n/a	n/a	n/a	n/a	Non-ruminant
Palazzo Bonagia (PA)	PB	PB_C51	Late 10th- early 11th century	Partially glazed Cooking pot	Wheel thrown	East Sicily	PB988	Sacco V. L’islamizzazione a Palermo attraverso due contesti di palazzo Bonagia (scavi di Stefano). 2014; 225–231.	Form 8	46.8139	C8:0-C30:0	C15:0 (br and n), C17:0 (br and n), C19, C23, C21, C25, C27	C18:1	0.803489	0.0844782			18				TMTD, Phyt	57.154						-29.01	-29.99	-0.97	n/a	n/a	n/a	n/a	Non-ruminant +heating
Palazzo Bonagia (PA)	PB	PB_C52	Second half of 10th century	Pan	Wheel thrown	Palermo	PB989	Sacco V. L’islamizzazione a Palermo attraverso due contesti di palazzo Bonagia (scavi di Stefano). 2014; 225–231.	Form 9	35.0531	C14:0-C28:0	C13:0, C15:0 (br and n), C17:0 (br and n) (small), C19, C23, C21,	C16:1,C18:1, C22:1	0.819988	0.10045			18				Prist		cholesterol					-30.22	-30.22	-0.01	n/a	n/a	n/a	n/a	Non-ruminant +heating
Palazzo Bonagia (PA)	PB	PB_C53	Late 10th- early 11th century	Pan	Wheel thrown	Palermo	PB913	Sacco V. L’islamizzazione a Palermo attraverso due contesti di palazzo Bonagia (scavi di Stefano). 2014; 225–231.	Form 9	1.8906	C16:0-C18:0		C18:1	0.652217	0.128087														n/a	n/a	n/a	n/a	n/a	n/a	n/a	UI Below limit of interpretation
Palazzo Bonagia (PA)	PB	PB_C54	Second half of 10th century	Pan	Wheel thrown	Palermo	PB856	Sacco V. L’islamizzazione a Palermo attraverso due contesti di palazzo Bonagia (scavi di Stefano). 2014; 225–231.	Form 9	29.7139	C14:0-C26:0	C13:0, C15:0 (br and n), C17:0 (br and n) (small), C19, C23, C21,	C16:1, C18:1	0.735303	0.0892713									cholesterol					-30.22	-30.15	0.07	n/a	n/a	n/a	n/a	Non-ruminant
Palazzo Bonagia (PA)	PB	PB_C55	Late 10th- early 11th century	Brazier	Wheel thrown	Palermo	PB909	Sacco V. L’islamizzazione a Palermo attraverso due contesti di palazzo Bonagia (scavi di Stefano). 2014; 225–231.	Form 7	39.7191	C14:0-C28:0	C13:0, C15:0 (br and n), C17:0 (br and n) (small), C19, C23, C21, 25 (VERY SMALL)	C16:1, C18:1, C22:1	0.765548	0.0554992							Prist		cholesterol					-29.9	-29.84	0.05	n/a	n/a	n/a	n/a	Non-ruminant
Palazzo Bonagia (PA)	PB	PB_C55(BIS)	Second half of 10th century	Brazier	Wheel thrown	Palermo	PB478	Sacco V. L’islamizzazione a Palermo attraverso due contesti di palazzo Bonagia (scavi di Stefano). 2014; 225–231.	Form 7	138.429	C12:0-C28:0	C13:0, C15:0 (br and n), C17:0 (br and n) , C19, C23, C21, 25	C16:1, C18:1, C22:1	0.896305	0.197388			18						cholesterol					-29.99	-29.86	0.13	n/a	n/a	n/a	n/a	Non-ruminant +heating
Palazzo Bonagia (PA)	PB	PB_C56	Early Islamic	Brazier	Wheel thrown	Palermo	PB739	Sacco V. L’islamizzazione a Palermo attraverso due contesti di palazzo Bonagia (scavi di Stefano). 2014; 225–231.	Form 7	81.6838	C12:0-C28:0	C13:0, C15:0 (br and n), C17:0 (br and n) , C19, C23, C21, 25	C16:1, C18:1, C22:1	0.869	0.102658									cholesterol					-29.61	-29.34	0.27	n/a	n/a	n/a	n/a	Non-ruminant
Palazzo Bonagia (PA)	PB	PB_C57	Early Islamic	Stone plate	Limestone		PB738	Sacco V. L’islamizzazione a Palermo attraverso due contesti di palazzo Bonagia (scavi di Stefano). 2014; 225–231.	Form 6	0	C16:0-C18:0																		n/a	n/a	n/a	n/a	n/a	n/a	n/a	UI Below limit of interpretation

## Sheet:  Casale San Pietro (CLESP)
Site		Sample information							Fatty acids					Ketones and APAAs			Alkanes and alcohols		Diterpenes	Isoprenoids	SRR%	Sterols	Wax esters	TAGs			GC-C-IRMS			Fruit carboxylic acids	Malic acid yield (µg/g)	Tartaric acid yield (µg/g)	%TA	Summary substance identification
Site name	Site code	Sample code	Chronology	Form	Technology	Provinance	Form Id	yield (µg/g)	sat. even-numb.	sat. odd-numb.	unsaturated	P/S (ug)	O/S (ug)	High temp. KT	Plant KT	APPAs	Alkanes	Alcohols (TMS)						Carbon number	Average carbon number (M)	Dispersion factor (DF)	δ 13C16:0 (‰)	δ 13C18:0 (‰)	Δ13C (C18:0-C16:0)
Casale San Pietro	CLESP	CLESP_1	10th- 11th century	Stone plate	Limestone	?	Form 6	11.1961	C10:0-C28:0	C15:0(n and br), C17:0 (n and br), C19:0, C23:0, C25:0	C16:1, C18:1	1	0.116929									cholesterol					-29.364	-29.07	0.294	n/a	n/a	n/a	n/a	Non-ruminant
Casale San Pietro	CLESP	CLESP_2	10th- 11th century	Olla	Wheel thrown	Palermo	Form 3a	406.692	C12:0-C26:0	C15:0(n and br), C17:0 (n and br)	C18:1, C16:1, C22:1	0.94	0.233841									cholesterol					-29.076	-28.817	0.259	malic, tartaric (tr)	0.988	traces		Non-ruminant
Casale San Pietro	CLESP	CLESP_3	10th- 11th century	Olla	Wheel thrown	Palermo	Form 3a	153.17	C12:0-C30:0	C15:0(n and br), C17:0 (n and br), C19:0, C23:0, C25:0	C18:1	0.881131	0.166818	KT31,33,35													-28.441	-29.047	-0.606	malic, tartaric (tr)	1.836	traces		Non-ruminant + fruit +heating
Casale San Pietro	CLESP	CLESP_4	10th- 11th century	Cooking pot	Handmade	Local?	Form 5	1213.64	C8:0-C30:0	C9:0, C11:0, C13:0, C15:0(n and br), C17:0 (n and br), C19:0, C21:0, C23:0, C25:0, C27:0, C29:0	C18:1, C16:1, C22:1	0.96	0.621032		KT29(Nonacosan-10-one)							cholesterol					-28.731	-30.689	-1.958		0	0		Ruminant + plant wax (Fennel)
Casale San Pietro	CLESP	CLESP_5	10th- 11th century	Olla	Wheel thrown?	Calcitic	Form 3b	13.4285	C12:0-C24:0	C15:0(n and br), C17:0 (n and br), C19:0, C21:0 C23:0	C18:1, C16:1, C22:1	1.1	0.145543		KT29(Nonacosan-10-one)		ALK27, ALK29, ALK30	OH24, OH26, OH28, 0H30									-29.283	-30.328	-1.045	malic, tartaric (tr), succinic	2.155	traces		Ruminant + plant wax (Fennel)+ fruit
Casale San Pietro	CLESP	CLESP_11	10th- 11th century	Olla	Wheel thrown	Palermo	Form 3a	318.21	C8:0-C28:0	C15:0(n and br), C17:0 (n and br), C19:0, C25:0	C18:1, C16:1, C22:1	0.998593	0.79					OH26,		Phyt	55.7187	cholesterol		42-54	50.54	2	-27.713	-28.624	-0.91	malic, tartaric	1.1653	0.099	0.0781	Non-ruminant+ fruit
Casale San Pietro	CLESP	CLESP_12	10th- 11th century	Olla	Wheel thrown	Palermo	Form 3a	535.711	C14:0-C28:0	C15:0(n and br), C17:0 (n and br), C19:0, C25:0	C16:1, C18:1 (dominant peak), C18:2	2.12708	2.90284					OH24, OH26, OH28, 0H30				cholesterol, β-Sitosterol		48			-28.363	-29.521	-1.158	n/a	n/a	n/a	n/a	Ruminant adipose + Plant oil
Casale San Pietro	CLESP	CLESP_14	10th- 11th century	Olla	Wheel thrown	Palermo	Form 3a	52.816	C14:0-C26:0	C15:0(n and br), C17:0 (n and br), C25:0	C16:1 (tr), C18:1, C22:1	0.753253	0.1							Phyt	48.8263	cholesterol					-30.169	-29.805	0.364	malic, tartaric	0.07	0.03	0.285	Non-ruminant
Casale San Pietro	CLESP	CLESP_15	10th- 11th century	Olla	Wheel thrown	Palermo	Form 3a	67.5985	C14:0-C26:0	C15:0(n and br), C17:0 (n and br), C25:0	C18:1, C22:1	0.950314	0.210979							Prist		cholesterol					-29.747	-29.987	-0.24	n/a	n/a	n/a	n/a	Non-ruminant
Casale San Pietro	CLESP	CLESP_16	10th- 11th century	Olla	Wheel thrown	Palermo	Form 3a	94.3486	C8:0-C28:0	C15:0(n and br), C17:0 (n and br)	C16:1, C18:1, C18,2, 22:1, 20:1	1.15263	0.84					OH26									-28	-28.265	-0.265	malic, tartaric, succinic, maleic	1.3435	0.725	0.3506	Non-ruminant +grape product
Casale San Pietro	CLESP	CLESP_18	10th- 11th century	Olla	Wheel thrown	Palermo	Form 3a	382.442	C10:0- C26:0	C13:0 (n and br), C15:0 (n and br), C17:0 (n br), C19:0, C21:0, 23:0, C25:0	C16:1, C18:1, C18:2, C22:1	1.08359	1.15148			18(tr)	ALK27, ALK29, ALK31			Phyt	62.9081	cholesterol					-28.938	-31.778	-2.841	malic, tartaric	1.6122	0.24	0.1298	Ruminant adipose + Unidentified wax + fruit + heating
Casale San Pietro	CLESP	CLESP_19	10th- 11th century	Olla	Wheel thrown	Palermo	Form 3a	118.943	C10:0-C30:0	C15:0(n and br), C17:0 (n and br), C19:0, 21:0. C23:0, C25:0	C16:1, C18:1, 22:1, 20:1	0.98828	0.602247		KT29(Nonacosan-10-one)							cholesterol, β-Sitosterol		48-54	51.16	1.18	n/a	n/a	n/a	n/a	n/a	n/a	n/a	Ruminant adipose + plant wax (Fennel) fruit +heating
Casale San Pietro	CLESP	CLESP_20	10th- 11th century	Olla	Wheel thrown	Palermo	Form 3a	131.299	C8:0-C28:0	C15:0(n and br), C17:0 (n and br), C23:0	C16:1, C18:1	1.06847	0.726756									cholesterol		48-54	49.57	2.36	-28.953	-29.765	-0.812	malic, tartaric, succinic, fumaric, maleic	1.5291	0.595	0.2801	Non-ruminant + fruit
Casale San Pietro	CLESP	CLESP_21	10th- 11th century	Cooking pot	Handmade	Local?	Form 5	471.2	C14:0-C24:0	C15:0(n and br), C17:0 (n and br), C19:0	C18:1, C18:2	1.03866	0.525817			18(tr)						cholesterol		42-54	51.78	1.13	-27.83	-29.709	-1.879	n/a	n/a	n/a	n/a	Ruminant adipose + heating
Casale San Pietro	CLESP	CLESP_22	10th- 11th century	Cooking pot	Slow thrown	Calcitic	Form 2	26.0245	C8:0-C28:0	C15:0(n and br), C17:0 (n and br), C25:0	C18:1	2.90407	0.509856														-28.01	-29.229	-1.219	n/a	n/a	n/a	n/a	Non-ruminant
Casale San Pietro	CLESP	CLESP_23	10th- 11th century	Olla	Wheel thrown	Palermo	Form 3a	109.425	C12:0-C30:0	C15:0(n and br), C17:0 (n and br), C19:0, C21:0, C23:0, C25:0	C16:1 (tr), C18:1, C22:1	1.09163	0.609991							TMTD, Prist, Phyt	70.5418	cholesterol, β-Sitosterol		48-54	51.14	1.3	-28.367	-29.854	-1.488	n/a	n/a	n/a	n/a	Ruminant + unidentified plant
Casale San Pietro	CLESP	CLESP_24	10th- 11th century	Olla	Wheel thrown	Palermo	Form 3a	142.967	C10:0-C28:0	C13:0(n and br), C15:0 (n and br), C17, C19:0, C21:0, C23:0, C25:0	C16:1, C18:1	0.978243	0.69		KT29(15-nonancosanone)	18	ALK27, ALK29, ALK31	OH22, OH24, OH26, OH28, OH30									-28.785	-29.772	-0.987	malic, tartaric, succinic	1.0478	0.411	0.2817	Non-ruminant + plant wax (Brassica)+fruit product heating
Casale San Pietro	CLESP	CLESP_25	10th- 11th century	Olla	Wheel thrown	Palermo	Form 3a	21.0751	C14:0-C24:0	C15:0 (n and br), C17	C18:1, C22:1	0.864657	0.117363									cholesterol, β-Sitosterol					-30.093	-30.214	-0.121	n/a	n/a	n/a	n/a	Non-ruminant + unidentified plant
Casale San Pietro	CLESP	CLESP_26	10th- 11th century	Cooking pot	Slow thrown	Calcitic	Form 2	64.5806	C12:0-C26:0	C15:0(n and br), C17:0 (n and br), C23:0	C18:1	1.14457	0.275327									cholesterol		42-54	48.88	2.22	-27.149	-30.614	-3.466	n/a	n/a	n/a	n/a	Dairy
Casale San Pietro	CLESP	CLESP_27	10th- 11th century	Cooking pot	Slow thrown	Calcitic	Form 2	76.9	C8:0-C28:0	C11:0?,C15:0(n and br), C17:0 (n and br), C21:0, C25:0	C18:1	0.888993	0.265415							TMTD, Phyt	74.3898	β-Sitosterol		44-54	50.64	1.67	-27.189	-29.178	-1.989	n/a	n/a	n/a	n/a	Ruminant adipose
Casale San Pietro	CLESP	CLESP_28	10th- 11th century	Olla	Wheel thrown	Palermo	Form 3a	16.1115	C14:0-C24:0	C15:0(n and br), C17:0 (n and br)	C18:1, C22:1	0.855967	0.0937374			18				Phyt	54.4751						-29.261	-30.459	-1.198	n/a	n/a	n/a	n/a	Ruminant + heating
Casale San Pietro	CLESP	CLESP_29	10th- 11th century	Olla	Wheel thrown	Palermo	Form 3a	491.547	C12:0-C28:0	C13:0(n and br), C15:0 (n and br), C17, C19:0, C23:0, C25:0C21:0	C16:1, C18:1	1.01012	0.29			18				Phyt	73.9915	cholesterol		48-52	50.54	1.02	-27.9319	-27.741	0.190919	malic, succinic	0.3121	0	0	Non-ruminant (porcine?) + heating
Casale San Pietro	CLESP	CLESP_30	10th- 11th century	Olla	Wheel thrown	Palermo	Form 3a	22.764	C12:0-C26:0	C15:0(n and br), C17:0 (n and br), C23:0	C16:1, C18:1, C22:1	0.907611	0.264007							Prist, Phyt	55.1905	cholesterol, β-Sitosterol					-29.098	-31.021	-1.923	n/a	n/a	n/a	n/a	Ruminant adipose + unidentified plant
Casale San Pietro	CLESP	CLESP_31	10th- 11th century	Pan?	Slow thrown	Calcitic	Form 1	369.968	C6:0- C28:0	C5:0, C7:0, C9:0, C11:0, C13:0, C15:0(n and br), C17:0 (n and br), C19:0, C21:0, C23:0, C25:0	C18:1	0.562763	0.230706	KT31, KT33, KT35		18(tr)				Phyt	56.6538	cholesterol, β-Sitosterol					-27.633	-29.881	-2.249	n/a	n/a	n/a	n/a	Ruminant adipose + unidentified plant + heating
Casale San Pietro	CLESP	CLESP_33	10th- 11th century	Cooking pot	Slow thrown	Calcitic	Form 2	267.053	C8:0-C30:0	C9:0, C11:0, C13:0, C15:0(n and br), C17:0 (n and br)?, C19:0, C21:0, C23:0, C25:0, C27:0, C29:0	C16:1, C18:1	0.813409	0.268487	KT31, KT33, KT35	KT29(15-nonancosanone)		ALK27, ALK29, ALK31	OH24, OH26, 0H28, 0H30		Phyt	61.881	β-Sitosterol		42-54	51.14	1.22	-27.8072	-27.7417	0.0655371	n/a	n/a	n/a	n/a	Non-ruminant (porcine?) + plant wax (brassica)+ heating
Casale San Pietro	CLESP	CLESP_35	10th- 11th century	Cooking pot	Slow thrown	Calcitic	Form 2	105.662	C8:0-C30:0	C9:0, C11:0, C13:0, C15:0(n and br), C17:0 (n and br), C19:0, C21:0, C23:0, C25:0	C18:1	0.840703	0.356164				ALK25, ALK27, ALK29, ALK31	24OH, 26OH,		TMTD, Prist, Phyt	49.2531	cholesterol and stigmasterol		46-54	50.65	1.54	-27.789	-30.551	-2.762		0	0		Ruminant adipose +Unidentified plant wax
Casale San Pietro	CLESP	CLESP_37	10th- 11th century	Cooking pot	Slow thrown	Calcitic	Form 2	26.9044	C12:0-C26:0	C15:0(n and br), C17:0 (n and br), C23:0, C25:0	C18:1, C22:1	2.2793	0.414485				ALK23,ALK25,ALK27, ALK29, ALK31, ALK33					cholesterol and stigmasterol		48-54	51.21	1.57	-25.761	-29.964	-4.203		0	0		Dairy
Casale San Pietro	CLESP	CLESP_38	10th- 11th century	Olla	Wheel thrown	Calcitic	Form 3b	9.40362	C14:0-C18:0	C15:0(n and br), C17:0 (n and br)	C18:1, C22:1	1.19651	0.255446							Prist, Phyt	40.1846			48-54	51.46	1.24	-29.305	-31.414	-2.109	succinic	0	0		Ruminant adipose
Casale San Pietro	CLESP	CLESP_39	10th- 11th century	Cooking pot	Slow thrown	Calcitic	Form 2	90.7809	C8:0- C28:0	C9:0, C11:0, C13:0, C15:0(n and br), C17:0 (n and br), C19:0, C21:0, C23:0, C25:0	C16:1(tr), C18:1	0.965528	0.590789	KT31, KT33, KT35						Phyt	52.2366	stigmasterol	WE C16:0, C18:0, C20:0, C22:0	42-54	48.36	2.62	-28.397	-30.141	-1.743	n/a	n/a	n/a	n/a	Ruminant adipose + dairy + heating
Casale San Pietro	CLESP	CLESP_40	10th- 11th century	Cooking pot	Slow thrown	Calcitic	Form 2	72.0769	C10:0- C26:0	C15:0 (n and br), C17:0 (n br), C19:0?, C21:0, 23:0, C25:0	C22:1, C16:1. C18:1	0.8212	0.288825			18(tr)				Phyt	45.8918	cholesterol, β-Sitosterol		48-52			-29.932	-31.325	-1.393	n/a	n/a	n/a	n/a	Ruminant adipose + unidentified plant + heating
Casale San Pietro	CLESP	CLESP_41	10th- 11th century	Olla	Wheel thrown	Calcitic	Form 3b	166.536	C10:0- C26:0	C15:0 (n and br), C17:0 (n br), C19:0?, C21:0, 23:0, C25:0	C22:1, C16:1. C18:1	0.690224	0.252077			16, 18				TMTD, Phyt	37.2919	cholesterol, β-Sitosterol		42-54	48.88	2.02	-29.357	-33.597	-4.239		0	0		Dairy + heating
Casale San Pietro	CLESP	CLESP_42	10th- 11th century	Olla	Wheel thrown	Palermo	Form 3a	86.3028	C12:0-C26:0	C15:0 (n and br), C17:0 (n br), C19:0?, C21:0, 23:0, C25:0	C22:1, C16:1. C18:1	0.856487	0.192158									cholesterol					-30.156	-30.008	0.147	n/a	n/a	n/a	n/a	Non-ruminant
Casale San Pietro	CLESP	CLESP_43	10th- 11th century	Olla	Wheel thrown	Palermo	Form 3a	166.309	C12:0-C26:0	C15:0 (n and br), C17:0 (n br), C19:0, C21:0, 23:0, C25:0	C22:1, C16:1. C18:1	0.909282	0.414853							Phyt	52.7064	cholesterol					-29.471	-31.259	-1.788	n/a	n/a	n/a	n/a	Ruminant adipose
Casale San Pietro	CLESP	CLESP_46	10th- 11th century	Olla	Wheel thrown	Palermo	Form 3a	176.023	C8:0-C30:0	C15:0 (n and br), C17:0 (n br), C19:0, C21:0, 23:0, C25:0	C22:1, C16:1. C18:1	0.947317	0.330826		KT29(Nonacosan-10-one)	18	ALK29, ALK31			TMTD, Phyt	53.3312			42-54	49.17	2.57	-29.359	-29.586	-0.227	malic, tartaric, succinic, maleic, malonic	0.3191	0.255	0.4443	Non-ruminant +plant wax (Fennel)+ grape product +heating
Casale San Pietro	CLESP	CLESP_47	10th- 11th century	Brazier	Handmade	Local?	Form 7	48.7355	C8:0-C30:0	C15:0 (n and br), C17:0 (n br), C19:0, C21:0, 23:0, C25:0	C22:1, C16:1. C18:1	0.923073	0.221927				ALK21, ALK23, ALK25, ALK27, ALK29, ALK31, ALK33										-29.445	-29.676	-0.231	n/a	n/a	n/a	n/a	Non-ruminant
Casale San Pietro	CLESP	CLESP_49	11th-12th century	Olla	Wheel thrown	Palermo	Form 3a	449.647	C12:0-C26:0	C13:0,C15:0 (n and br), C17:0 (n br), C19:0, C21:0, 23:0, C25:0	C22:1, C16:1. C18:1	0.895575	0.563668			18(tr)				Phyt	52.8834	cholesterol					-29.08	-29.324	-0.244	n/a	n/a	n/a	n/a	Non-ruminant +heating
Casale San Pietro	CLESP	CLESP_51	11th-12th century	Cooking pot	Slow thrown	Calcitic	Form 2	99.3294	C14:0-C28:0	C15:0 (n and br), C17:0 (n br),C21:0, 23:0, C25:0	C16:1, C18:1	1.04	0.35			18	ALK25, ALK27, ALK29			Phyt	59.2108						-28.046	-30.914	-2.868	n/a	n/a	n/a	n/a	Ruminant adipose + heating
Casale San Pietro	CLESP	CLESP_54	10th- 11th century	Olla	Wheel thrown	Calcitic	Form 3b	29.8598	C12:0-C24:0	C13:0,C15:0 (n and br), C17:0 (n br), C19:0, C21:0, 23:0,	C16:1, C18:1	0.837547	0.225513							Phyt	46.8316						-29.537	-31.494	-1.957	n/a	n/a	n/a	n/a	Ruminant adipose
Casale San Pietro	CLESP	CLESP_55	10th- 11th century	Cooking pot	Slow thrown	Calcitic	Form 2	97.1265	C12:0-C26:0	C13:0,C15:0 (n and br), C17:0 (n br), C19:0, C21:0, 23:0,	C22:1, C16:1. C18:1	0.564918	0.105697			18	ALK27, ALK29, ALK31			TMTD, Phyt	44.6803	β-Sitosterol					-28.771	-30.578	-1.806	n/a	n/a	n/a	n/a	Ruminant adipose + unidentified plant wax + heating
Casale San Pietro	CLESP	CLESP_56	10th- 11th century	Olla	Wheel thrown	Palermo	Form 3a	59.1341	C12:0-C28:0	C13:0, C15:0 (n and br), C17:0 (n br),C21:0, 23:0, C25:0( minor)	C16:1, C18:1, C22:1	0.845963	0.192642														-30.261	-29.845	0.417	malic	0.306	0	0	Non-ruminant
Casale San Pietro	CLESP	CLESP_57	10th- 11th century	Cooking pot	Slow thrown	Flyish	n/a	4.83143	C16:0-C18:0																		N/A	N/A	N/A	n/a	n/a	n/a	n/a	UI
Casale San Pietro	CLESP	CLESP_58	11th-12th century	Olla	Wheel thrown	Palermo	Form 3a	79.0648	C14:0-C28:0	C15:0 (n and br), C17:0 (n br),C21:0, 23:0,	C16:1, C18:1, C22:1	0.95	0.01		KT29(Nonacosan-10-one)		ALK25, ALK27, ALK29, ALK31										-28.886	-29.29	-0.404	n/a	n/a	n/a	n/a	Non-ruminant +plant wax (Fennel)
Casale San Pietro	CLESP	CLESP_59	11th-12th century	Stone plate	Limestone		Form 6	8.8	C16:0-C18:0			0.83															-27.28	-27.43	-0.151844	n/a	n/a	n/a	n/a	Non-ruminant (porcine?)
Casale San Pietro	CLESP	CLESP_61	10th- 11th century	Olla	Wheel thrown	Palermo	Form 3a	112.449	C12:0-C28:0	C15:0 (n and br), C17:0 (n br)	C16:1, C18:1, C22:1	0.923099	0.417475			18(tr)	ALK25, ALK27, ALK29										-29.767	-29.839	-0.072	malic, tartaric, fumaric, succinic, maleic, malanoic	0.2579	3.243	0.9263	Non-ruminant + grape product +heating
Casale San Pietro	CLESP	CLESP_73	11th-12th century	Cooking pot	Slow thrown	Calcitic	Form 2	108.19	C12:0-C28:0	C15:0 (n and br), C17:0 (n br), C19(tr), C21:0 C23:0, C25:0	C16:1, C18:1	1.36	0.84				ALK24, ALK25, ALK26, ALK27, ALK29, ALK31										-29.27	-29.91	-0.64006	n/a	n/a	n/a	n/a	Non-ruminant +unidentified plant wax
Casale San Pietro	CLESP	CLESP_C107A	10th- 11th century	Olla	Wheel thrown	Palermo	Form 3a	245.033	C10:0-C28:0	C13:0, C15:0 (n and br), C17:0 (n br), C19:0, C21:0 C23:0, C25:0	C16:1 (tr), C18:1	0.830844	0.558787									cholesterol		42-54	50.8	1.6	-27.982	-31.003	-3.022	malic, succinic	0.6167	0	0	Ruminant adipose
Casale San Pietro	CLESP	CLESP_111	9th-10th century	Olla	Wheel thrown	Palermo	Form 3a	136.9	C12:0-C30:0	C13:0, C15:0 (n and br), C17:0 (n br), C19:0, C21:0 C23:0, C25:0	C16:1 (tr), C18:1	0.74	0.54				ALK25, ALK27, ALK29, ALK31										-29.02	-29.65	-0.63066	malic, tartaric, succinic	1.442	0.15	0.092	Non-ruminant + unidentified plant wax + fruit
Casale San Pietro	CLESP	CLESP_121	11th century	Olla	Wheel thrown	Calcitic	Form 3b	88.31	C10:0-C28:0	C11:0, C13:0, C15:0 (n and br), C17:0 (n br), C19:0, C21:0 C23:0, C25:0	C16:1 (tr), C18:1	0.626724	0.115438		KT29(Nonacosan-10-one)		ALK25, ALK27, ALK29, ALK31			Phyt	55.993						-26.395	-29.316	-2.921	malic, succinic	0.1404	0	0	Ruminant adipose + plant wax (Fennel)
Casale San Pietro	CLESP	CLESP_122	11th century	Olla	Wheel thrown	Calcitic	Form 3b	39.7016	C12:0-C28:0	C13:0, C15:0 (n and br), C17:0 (n br), C19:0, C21:0 C23:0, C25:0	C16:1, C18:1, C20:1 , C22:1	0.845123	0.277988									cholesterol					-28.515	-28.163	0.352	malic, tartaric	0.2998	0.121	0.2881	Non-ruminant (porcine?)
Casale San Pietro	CLESP	CLESP_123	11th century	Olla	Wheel thrown	Palermo	Form 3a	183.611	C10:0-C28:0	C13:0, C15:0 (n and br), C17:0 (n br), C19:0, C21:0 C23:0, C25:0	C16:1, C18:1, C20:1 , C22:1	0.864548	1				ALK27, ALK29, ALK31					cholesterol		48-54	51.06	1.22	-28.013	-30.93	-2.918	malic, tartaric (tr), succinic, fumaric, maleic, malanoic	0.1196	traces		Ruminant adipose
Casale San Pietro	CLESP	CLESP_130	10th-11th century	Olla	Wheel thrown	Palermo	Form 3a	17.1507	C12:0-C24:0	C15 (br and n), C17 (br and n) (tr)	C16:1 (tr), C18:1, C22:1	1.04938	0.570004														-29.304	-29.337	-0.034	malic, tartaric	0.191	0.397	0.6755	Non-ruminant + grape product
